# Supplementary material
Source: ML conference proceedings conference paper supplement (https://proceedings.mlr.press/v31/foti13a.html)
Supplement: Supplementary file [file foti13a-supp.pdf]

# Supplementary Material:

## A unifying representation for a class of dependent random measures

### 1 Introduction

We present a complete description of the tGaP-PFA topic model, the associated Gibbs sampler and how to compute perplexity for unseen documents under the model with samples drawn from the Gibbs sampler.

### 2 Model

Recall that  $w_{pnt}$  represents the number of occurrences of word  $p$  in the  $n$ th document at time  $t$ , and that we decompose this as  $w_{pnt} = \sum_{k=1}^{\infty} \tilde{w}_{pntk}$ , where  $\tilde{w}_{pntk}$  is the number of occurrences attributed to topic  $k$ . In the generative process presented below,  $p$  indexes the vocabulary,  $t$  indexes the observed times of documents,  $n$  indexes the documents at a time  $t$  and takes values in  $\{1, \dots, N_t\}$ , and  $k$  indexes the topics. Additionally,  $l$  indexes the kernel functions of the RVM (Tipping, 2001) with centers  $m_l$ , which we take to be the locations of the observations (although this is not necessary).

The generative process is as follows

$$\Gamma := \sum_{k=1}^{\infty} \pi_k \delta_{(x_k, \theta_k)} \sim \text{CRM}(\nu_{G_0}(d\pi)H(dx)G_0(d\theta)), \quad (1)$$

where  $x_k := (\omega_{0k}, \dots, \omega_{Lk}, \phi_k)$ ;  $\nu_{G_0}(d\pi) = \pi^{-1} \exp(-\pi)d\pi$  is the Lévy measure of the gamma process with parameters  $(1, 1)$ ;  $B_0(d\theta)$  is the  $P$ -dimensional Dirichlet distribution with parameter  $\alpha_\theta$ ; and  $H(dx) = H_\phi(d\phi) \prod_{l=0}^L H_\omega(d\omega_l)$ , where  $H_\phi(d\phi)$  is the categorical distribution over the dictionary of kernel widths, and  $H_\omega(d\omega_l) \sim \text{NiG}(0, c_0, d_0)$  is drawn from the normal-inverse gamma distri-

bution. The rest of the model is

$$p_{x_k}(t) = \Phi(\omega_{0k} + \sum_{l=1}^L \omega_{lk} \exp(-\phi_k \|t - t_l\|_2^2)) \quad (2)$$

$$r_k^{n,t} \sim \text{Ber}(p_{x_k}(t)) \quad (3)$$

$$G_{n,t} := \sum_{k=1}^{\infty} r_k^{n,t} \pi_k \delta_{\theta_k} \quad (4)$$

$$\beta_k^{n,t} \sim \text{Ga}(e, 1), n = 1, \dots, N_t, k \in \mathbb{N} \quad (5)$$

$$\tilde{w}_{pntk} \sim \text{Pois}(\theta_{kp} r_k^{n,t} \pi_k \beta_k^{n,t}) \quad (6)$$

$$w_{pnt} = \sum_{k=1}^{\infty} \tilde{w}_{pntk} \sim \text{Pois}\left(\sum_{k=1}^{\infty} \theta_{kp} r_k^{n,t} \pi_k \beta_k^{n,t}\right) \quad (7)$$

### 3 Gibbs sampler

We use a truncated version of the model by fixing the number of atoms we will represent to  $K$  and forming the (finite) random measure,  $\Gamma_K := \sum_{k=1}^K \pi_k \delta_{(x_k, \phi_k)}$ , where  $\pi_k \sim \text{Ga}(1/K, 1)$ ,  $x_k := (\omega_{0k}, \dots, \omega_{Lk}, \phi_k)$ ,  $\omega_{lk} \sim \text{NiG}(0, c_0, d_0)$ , and  $\phi_k \sim \{\phi_1^*, \dots, \phi_d^*\}$ . In the limit,  $K \rightarrow \infty$ ,  $\Gamma_K \rightarrow \Gamma$  in distribution. This truncation allows for the derivation of a straight-forward Gibbs sampler. We assume  $\mathcal{T}$  is the set of unique observed times.

We sample each of the variables in turn from their full conditional distributions. We use a standard data-augmentation technique for probit regression to sample the  $\omega_{lk}$  variables by introducing an auxiliary variable  $\tilde{r}_k^{n,t} \sim N(p_{x_k}(t), 1)$  for each topic  $k$  at each document  $n$  at time  $t$ , such that

$$r_k^{n,t} = \begin{cases} 1 & \text{if } \tilde{r}_k^{n,t} > 0 \\ 0 & \text{otherwise.} \end{cases}$$

See Albert & Chib (1993) for details of the data augmentation. The conditional distributions are as follows.

- **Topics,  $\theta_k$ .**

$$\theta_k | \dots \sim \text{Dir}(\alpha_\theta + \tilde{w}_{1..k}, \dots, \alpha_\theta + \tilde{w}_{P..k}) \quad (8)$$

$$\text{where } \tilde{w}_{p..k} = \sum_{t \in \mathcal{T}} \sum_{n=1}^{N_t} \tilde{w}_{pntk}.$$

- **Global topic proportions,  $\pi_k$ .**

$$\pi_k | \dots \sim \text{Ga}(\tilde{w}_{...k} + 1/K, \sum_{t \in \mathcal{T}} \sum_{n=1}^{N_t} \beta_k^{n,t} + 1) \quad (9)$$

$$\text{where } \tilde{w}_{...k} = \sum_{p=1}^P \sum_{t \in \mathcal{T}} \sum_{n=1}^{N_t} \tilde{w}_{pntk}.$$

- **Per-topic counts,  $\tilde{w}_{pntk}$ .**

$$(\tilde{w}_{pnt1}, \dots, \tilde{w}_{pntK}) | \dots \sim \text{Mult}(w_{pnt}; \xi_{pnt1}, \dots, \xi_{pntK}),$$

$$\text{where } \xi_{pntk} = \frac{\theta_{pk} r_k^{n,t} \pi_k \beta_k^{n,t}}{\sum_{j=1}^K \theta_{pj} r_j^{n,t} \pi_j \beta_j^{n,t}} \quad (10)$$

where we ensure that the denominator is greater than 0 by making sure that when sampling the  $r_k^{n,t}$ s, every document is not thinning at least one topic, i.e.  $\forall t \forall n \exists j, r_j^{n,t} = 1$ .

- **Per-document topic rate,  $\beta_k^{n,t}$ .**

$$\beta_k^{n,t} | \dots \sim \text{Ga}(\tilde{w}_{.ntk} + a, r_k^{n,t} \pi_k + 1) \quad (11)$$

where  $\tilde{w}_{.ntk} = \sum_{p=1}^P \tilde{w}_{pntk}$ .

- **Time-dependent indicators,  $r_k^{n,t}$ :** There are three cases:

1.  $\forall j, r_j^{n,t} = 0 \rightarrow r_k^{n,t} = 1$
2.  $\exists p, \tilde{w}_{pntk} > 0 \rightarrow r_k^{n,t} = 1$
3.  $\forall p, \tilde{w}_{pntk} = 0$

Cases 1 and 2 are deterministic. For case 3 let  $u_{pntk} \sim \text{Pois}(\rho_p)$  with  $\rho_p = \theta_{pk} \pi_k \beta_k^{n,t}$  denote the fictitious count of word  $p$  in the  $n$ th document at time  $t$  assigned to topic  $k$  disregarding  $r_k^{n,t}$ . The  $u_{pntk}$  allow us to determine whether  $\tilde{w}_{pntk} = 0$  because the topic has been thinned or because the topic is not popular (globally or for the individual document). Case 3 above then splits into the following cases:

1.  $\forall p, u_{pntk} = 0, r_k^{n,t} = 1$  with probability  $\propto p(r_k^{n,t} = 1) \prod_{p=1}^P \text{Pois}(0; \rho_p)$
2.  $\exists p, u_{pntk} > 0, r_k^{n,t} = 0$  with probability  $\propto p(r_k^{n,t} = 0) \left(1 - \prod_{p=1}^P \text{Pois}(0; \rho_p)\right)$
3.  $\forall p, u_{pntk} = 0, r_k^{n,t} = 0$  with probability  $\propto p(r_k^{n,t} = 0) \prod_{p=1}^P \text{Pois}(0; \rho_p)$

We evaluate the three probabilities and sample from the resulting discrete distribution.

- **RVM weights,  $\omega_{lk}$ .** We introduce the auxiliary variables  $\lambda_{lk}$  such that

$$\begin{aligned} \lambda_{lk} &\sim \text{Ga}(c_0, d_0) \\ \omega_{lk} &\sim N(0, \lambda_{lk}^{-1}). \end{aligned}$$

Let  $\boldsymbol{\omega}_k = (\omega_{0k}, \dots, \omega_{Lk})^T$  be the vector of RVM weights and  $\tilde{\mathbf{r}}_k$  be the vector of augmentation variables for all all time stamps, and

$$K_{tk} = (1, K(t, m_1, \phi_k), \dots, K(t, m_L, \phi_k))^T \quad (12)$$

be the vector of the evaluation of the RVM kernels for time  $t$ . Then, the conditional of  $\boldsymbol{\omega}_k$  is given by

$$\boldsymbol{\omega}_k | \tilde{\mathbf{r}}_k, \dots \sim N(\boldsymbol{\xi}, B) \quad (13)$$

where  $B = (\text{diag}(\lambda_{0k}, \dots, \lambda_{Lk}) + K_{tk}^T \tilde{\mathbf{r}}_k)^{-1}$  and  $\boldsymbol{\xi} = B K_{tk}^T \tilde{\mathbf{r}}_k$ .

- **RVM auxiliary variables**,  $\tilde{r}_k^{n,t}$ .

$$p(\tilde{r}_k^{n,t} | \dots) \propto \begin{cases} N(K_{tk}^T \boldsymbol{\omega}_k, 1) \mathbf{1}(\tilde{r}_k^{n,t} > 0), & \text{if } r_k^{n,t} = 1 \\ N(K_{tk}^T \boldsymbol{\omega}_k, 1) \mathbf{1}(\tilde{r}_k^{n,t} < 0), & \text{if } r_k^{n,t} = 0 \end{cases} \quad (14)$$

which is a truncated normal distribution that we sample using the inversion method described in Albert & Chib (1993).

- **RVM precisions**,  $\lambda_{lk}$ .

$$\lambda_{lk} | \dots \sim \text{Ga} \left( c_0 + \frac{1}{2}, d_0 + \frac{1}{2} \omega_{lk}^2 \right) \quad (15)$$

- **RVM kernel widths**,  $\phi_k$ . We assume a finite dictionary  $\{\phi_1^*, \dots, \phi_M^*\}$  of possible values for the RVM kernel widths, and a uniform prior on these values,

$$p(\phi_k = \phi_m^* | \dots) \propto \frac{1}{M} \prod_{t \in \mathcal{T}} \prod_{n=1}^{N_t} \Phi(p_{\phi_m^*}(t))^{r_k^{n,t}} (1 - \Phi(p_{\phi_m^*}(t)))^{1-r_k^{n,t}} \quad (16)$$

where we have denoted the thinning function as a function of  $\phi^*$  as the other variables are held fixed.

## 4 Perplexity

Similarly to Zhou et al. (2012), given  $B$  samples of the model parameters and latent variables we compute a Monte Carlo estimate of the held-out perplexity for unobserved counts  $Y = [y_p^{n,t}]$  as

$$\exp \left( \frac{1}{y_{\cdot}^{\cdot}} \sum_{p=1}^P \sum_{t \in \mathcal{T}} \sum_{n=1}^{N_t} y_p^{n,t} \log \frac{\sum_{b=1}^B \sum_{k=1}^K \theta_{pk}^{(b)} \pi_k^{(b)} r_{n,t,k}^{(b)} \beta_{n,t,k}^{(b)}}{\sum_{b=1}^B \sum_{p=1}^P \sum_{k=1}^K \theta_{pk}^{(b)} \pi_k^{(b)} r_{n,t,k}^{(b)} \beta_{n,t,k}^{(b)}} \right) \quad (17)$$

where we have used a superscript  $b$  to denote the  $b$ th sample of the parameters and latent variables<sup>1</sup> and  $y_{\cdot}^{\cdot} = \sum_{p=1}^P \sum_{t \in \mathcal{T}} \sum_{n=1}^{N_t} y_p^{n,t}$  denotes the held-out number of occurrences of word  $p$  in the  $n$ th document at time  $t$ .

## References

- Albert, J.H. and Chib, S. Bayesian analysis of binary and polychotomous response data. *JASA*, 88(422):669–679, 1993.
- Tipping, M. E. Sparse Bayesian learning and the relevance vector machine. *JMLR*, 1:211–244, 2001.
- Zhou, M., Hannah, L. A., Dunson, D. B., and Carin, L. Beta-negative binomial process and Poisson factor analysis. In *AISTATS*, 2012.

<sup>1</sup>We have denoted the  $b$ th samples of  $r_k^{n,t}$  and  $\beta_k^{n,t}$  as  $r_{n,t,k}^{(b)}$  and  $\beta_{n,t,k}^{(b)}$  for readability.
